# Supplementary material
Source: publisher figshare collection journal article supplement (https://gsajournals.figshare.com/ndownloader/files/13477466)
Supplement: Supplementary file 1 [file 13477466]

## Sheet: 3-1. Phenotype of deletions
Table S3-1. Positives from YKO screen
Gene	D phenotype in BY background with pRS-rho5(G12V)	D phenotype in HPY210 background without the RHO5 plasmid
GLO2	+++	+
RPL41B	+++	=
YGL159W	+++	+
MET1	+++	=
HIM1	+++	=
DSE1	+++	=
YOX1	+++	=
PAF1	+++	-
KIN3	+++	=
OYE3	+++	+
NMD2	+++	+
MEI4	+++	=
MSL1	+++	=
ATG21	+++	+++
MF(a)2	+++	=
DBF20	+++	+
CNB1	+++	=
YLR001C	+++	++
PML1	+++	-
YOR378W	+++	=
ISU1	+++	-
SPO1	+++	++
GAL7	+++	+
MSO1	+++	+++
YLR036C	+++	=
LSP1	+++	+
CAT2	++	+
SLI1	++	=
HXK2	++	+
HXT1	++	+
CDC10	++	+
SMI1	++	+
YBL095W	++	-
MSS1	++	+
RGT1	++	=
RIB1	++**	nd	**D in BY library is not the correct deletion.
RPL16A	++	+
YJR056C	++	=
OCA1	++	++
MSP1	++	+
SHE2	++	=
AIM27	++	=
AIM19	++	=
YNL134C	++	+
YOR227W	++	=
SUR7	++	+
RMA1	++	=
BNA1	++	=
UIP3	++	=
CWP1	++	+
RPL8A	++	+++
IMP2	++	=
RAS1	++	+
KGD1	+	-
KTR1	+	=
MNS1	+	=
CYS4	+	nd
TMA19	+	+++
RTN1	+	=
HXT3	+	+
VPH1	+	+
ARF1	+	+++
NCE102	+	+
SUC2	+	=
HXT5	+	=
DSE2	+	=
STE24	+	=
TOM70	+	+
# of strains confirmed to be resistant to H2O2	67	31

## Sheet: 3-2. DAVID analysis
Table S3-2. Functional Annotation Clustering of positives from YKO screen by DAVID analysis
	Category	Term	davidID	Pathway	Count	X.	PValue	Genes	List.Total	Pop.Hits	Pop.Total	Fold.Enrichment	Bonferroni	Benjamini	FDR
3	GOTERM_MF_DIRECT	GO:0005525~GTP binding	GO:0005525	GTP binding	8	1.61943	1.06e-06	MSS1, ARF1, RAS1, CDC10	23	163	6084	12.9827	1.16e-05	1.16e-05	0.000659641
12	GOTERM_BP_DIRECT	GO:0015031~protein transport	GO:0015031	protein transport	6	1.21457	0.000278283	ATG21, ARF1, NCE102	29	122	5681	9.63426	0.0118965	0.0118965	0.25867
13	GOTERM_CC_DIRECT	GO:0032126~eisosome	GO:0032126	eisosome	4	0.809717	5.45e-07	SUR7, NCE102	23	6	6961	201.768	1.2e-05	1.2e-05	0.000426345
19	GOTERM_CC_DIRECT	GO:0000220~vacuolar proton-transporting V-type ATPase	V0 domain	vacuolar proton-transporting V-type ATPase	3	0.607287	0.000422584	VPH1, RAS1, SUR7, NCE102	23	10	6961	90.7957	0.00925572	0.00463862	0.330252
20	GOTERM_MF_DIRECT	GO:0015078~hydrogen ion transmembrane transporter activity	GO:0015078	hydrogen ion transmembrane transporter activity	3	0.607287	0.00145273	VPH1	23	16	6084	49.5978	0.0158645	0.00796395	0.901545
22	GOTERM_CC_DIRECT	GO:0005886~plasma membrane	GO:0005886	plasma membrane	7	1.417	0.00329571	VPH1	23	489	6961	4.33244	0.0700508	0.0239178	2.5505
35	KEGG_PATHWAY	cal00052:Galactose metabolism	cal00052	Galactose metabolism	4	0.809717	0.000294382	HXK2, GAL7	15	30	3037	26.9956	0.00469973	0.00469973	0.208863
36	KEGG_PATHWAY	cal00520:Amino sugar and nucleotide sugar metabolism	cal00520	Amino sugar and nucleotide sugar metabolism	4	0.809717	0.00239767	HXK2, GAL7	15	61	3037	13.2765	0.0376806	0.0190212	1.69027
